# Supplementary material
Source: Springer Nature journal article supplement (https://www.springermedizin.de/resource/supplementary/12885_2011_2957_MOESM7_ESM.pdf/9462390)

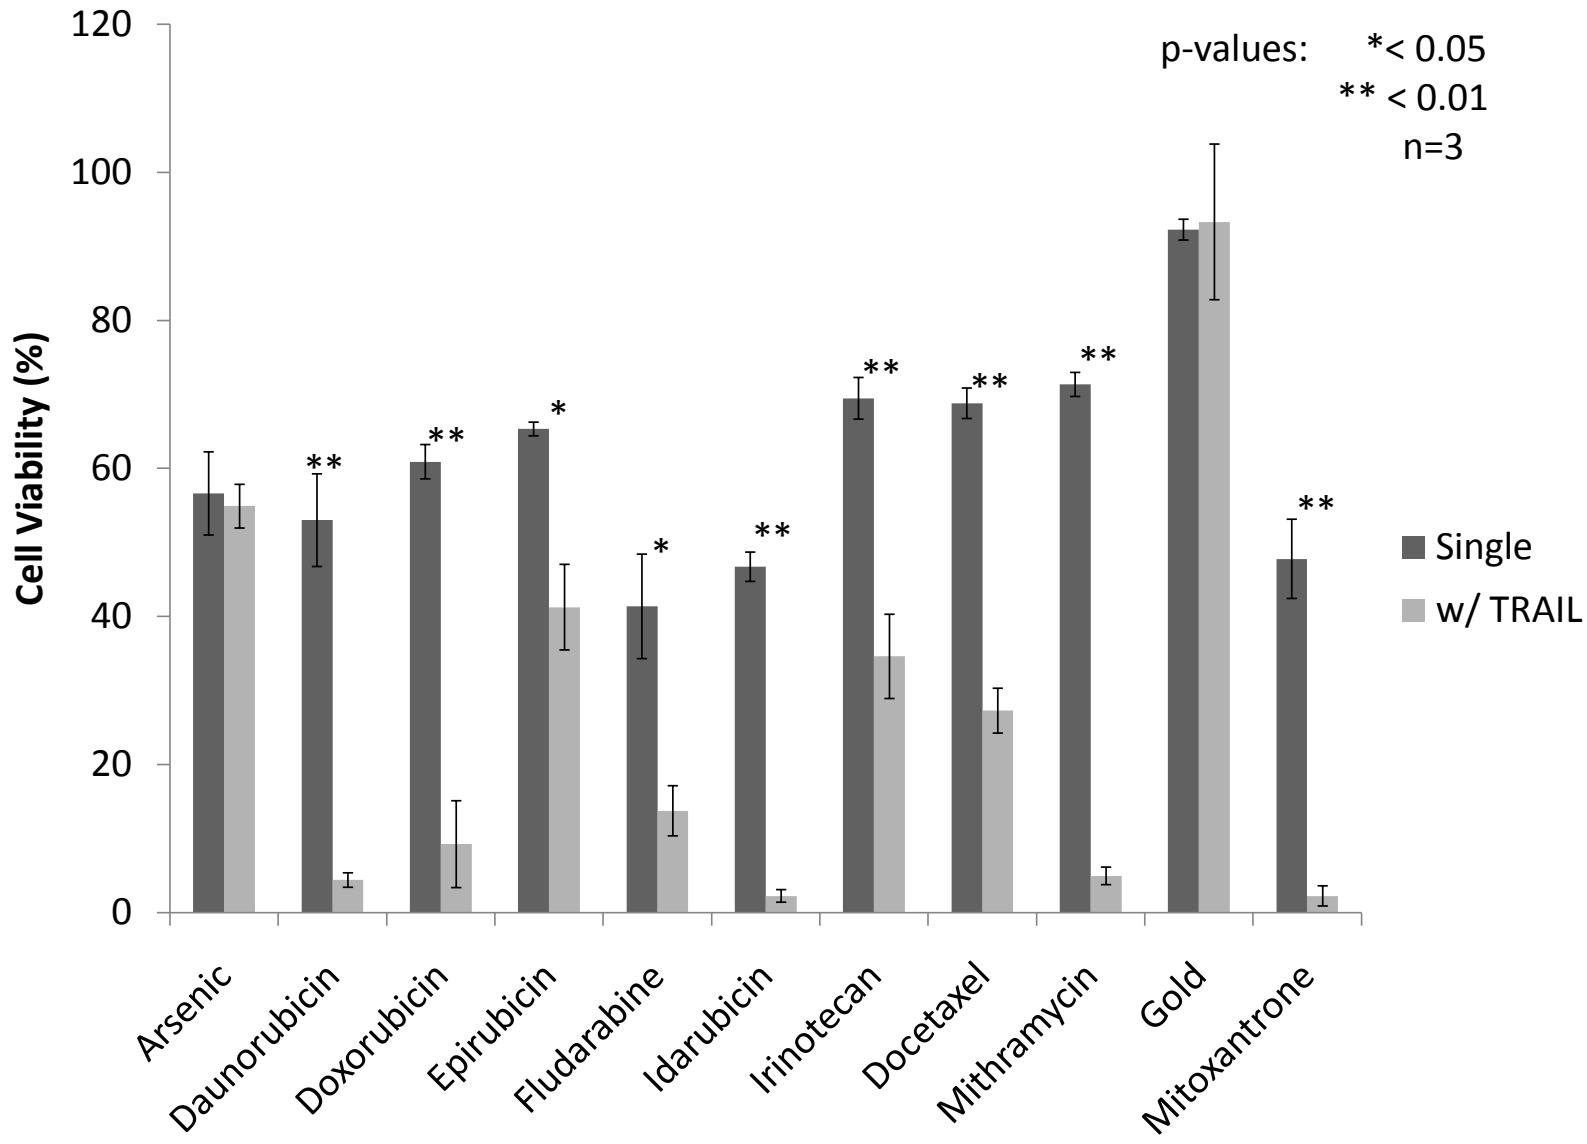

Supplement: MOESM7 [file 9462390]
